# Supplementary material
Source: PubMed Central journal article supplement (PMC8556673)
Supplement: NIHMS1689570-supplement-Supp_1.pdf [file NIHMS1689570-supplement-Supp_1.pdf]

## Supplement 1. Semi-Structured Interview Prompts

Let's talk about making this decision about treatment for your cancer.

1. Do you think the decision is/was easy, difficult, or somewhere in-between?
2. How did you or do you feel when thinking about this decision?
3. What did you experience or are you experiencing in making this decision?
  - a. *Probe:* Was there anything positive (or negative) you encountered while making this decision?
4. Were there or are there multiple treatment options?
  - a. *Probe:* If so, what are the treatment options that you had?
5. What do you see as the main advantages/benefits and disadvantages/risks of the options?
6. Who else was or is involved, if anyone, in making this decision with you?
  - a. *Probe:* Do they usually
    - i. make decisions for you,
    - ii. share decisions with you, or
    - iii. provide support for you to make decisions on your own?

Think about a recent major decision you made. What was your process for making that decision?

7. What helped or is helping you make this decision?
8. Was there anything that got or is getting in the way of making this decision? If so, what was it? (*If nothing reported, skip to next*)
9. Is there anything else that would overcome these barriers to decision making?
10. I will list possible ways that may help some cancer patients making a treatment decision. Which ones do you think might be useful to you (list a, b, c, d)?
  - a. counseling from health practitioner who is a physician
  - b. counseling from health practitioner who is a nurse
  - c. discussion groups of people facing the same decision
  - d. informational materials (*if yes, then explore content and format*)
    - i. *Probe:* What content should this tool include?
    - ii. *Probe:* What should this tool look like?

11. Is there anything else that would help better support you in treatment decision making that we haven't talked about?
12. Have you decided on primary treatment?
  - a. *Probe (if yes):* Ultimately, why did you decide on primary treatment?

## Supplement 2. Semi-Structured Focus Group Discussion Prompts

1. How did you first decide about your initial treatment for cancer?
2. Did you feel that you had a choice in treatment?
3. What did you understand were your options?
4. Who helped you make this decision?
5. What do you know now that you wish you had known when you were making your treatment decision?
6. Do you think people who were just diagnosed with oropharynx cancer would benefit from a decision tool explaining options?
  - a. *Probe (if yes):* what information should this tool contain?
  - b. *Probe (if yes):* what should this look like, or what form should this tool take?
